# Supplementary material for: Side chain position, length and odd/even effects on the 2D self-assembly of mono-substituted anthraquinone derivatives at the liquid/solid interface
Source: Royal Society of Chemistry journal article supplement (doi:10.1039/c5ra18434g), 2015-01-01
Supplement: c5ra18434g1.pdf [file c5ra18434g1.pdf]

## Supporting Information

### Side Chain Position, Length and Odd/Even Effects on 2D Self-Assembly of Mono-Substituted Anthraquinone Derivatives at Liquid/Solid Interface

Yi Hu, Kai Miao, Bao Zha, Xinrui Miao, Li Xu\* and Wenli Deng\*

College of Materials Science and Engineering, South China University of Technology, Guangzhou  
510640, China

**E-mail Address:** [mllxu@scut.edu.cn](mailto:mllxu@scut.edu.cn), [wldeng@scut.edu.cn](mailto:wldeng@scut.edu.cn)

**Corresponding author:** College of Materials Science and Engineering

South China University of Technology,

Wushan Road, Tianhe District, Guangzhou 510640, P. R. China.

Tel: (+86)020-22236708

E-mail: [mllxu@scut.edu.cn](mailto:mllxu@scut.edu.cn); [wldeng@scut.edu.cn](mailto:wldeng@scut.edu.cn)

## Synthesize

1-HA-OC<sub>n</sub> (*n* = 15, 16) and 2-HA-OC<sub>n</sub> (*n* = 12, 14–16) were synthesized from the commercially available 1-Hydroxyanthraquinone and 2-Hydroxyanthraquinone with BrC<sub>n</sub>H<sub>2n+1</sub> in DMF (dry, 150 °C, 50 mL) along with Cs<sub>2</sub>CO<sub>3</sub> added. The reaction finished twelve hours later and proved to be quite successful with a yield of (≥) 98%. The desired products were obtained by repeated recrystallization (four to six times) in view of high degree purity. The solvent was purchased from Tokyo Chemical Industry without further purification.

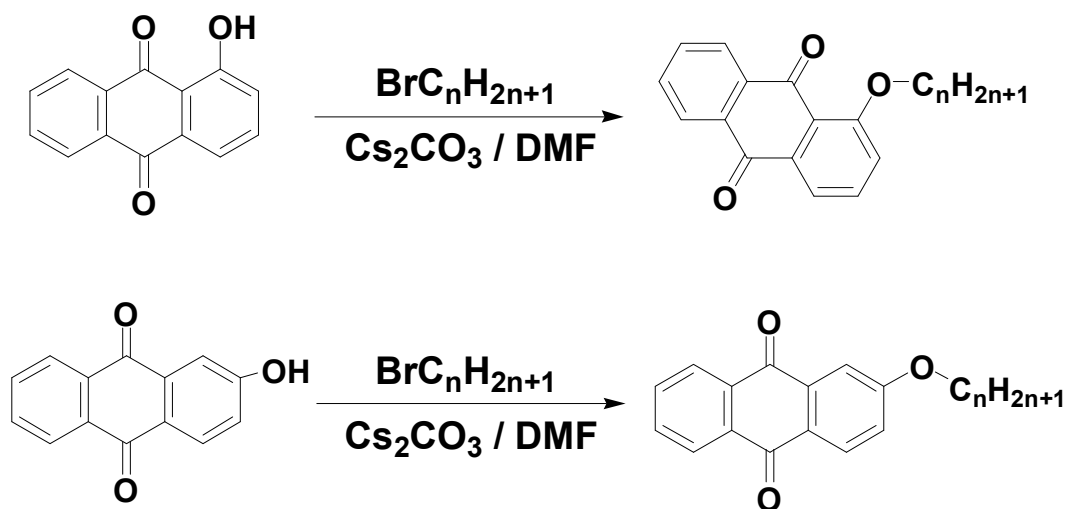

**Scheme S1.** Synthesis of 1-HA-OC<sub>n</sub> (*n* = 15, 16) and 2-HA-OC<sub>n</sub> (*n* = 12, 14–16) derivatives.

### Characterization data:

1-HA-OC<sub>15</sub>: <sup>1</sup>H NMR (400 MHz CDCl<sub>3</sub>) δ 8.22 (d, 1H), 8.16 (d, 1H), 7.88 (d, 1H), 7.66 (m, 3H), 7.27 (d, 1H), 4.10 (t, 2H), 1.90 (t, 2H), 1.19 (m, 24H), 0.81 (t, 3H)

MS: 457 [C<sub>29</sub>H<sub>38</sub>NaO<sub>3</sub>]<sup>+</sup>.

1-HA-OC<sub>16</sub>: <sup>1</sup>H NMR (400 MHz CDCl<sub>3</sub>) δ 8.22 (d, 1H), 8.17 (d, 1H), 7.89 (d, 1H), 7.66 (m, 3H), 7.27 (d, 1H), 4.10 (t, 2H), 1.90 (t, 2H), 1.19 (m, 26H), 0.81 (t, 3H)

MS: 449 [C<sub>30</sub>H<sub>41</sub>O<sub>3</sub>]<sup>+</sup>.

2-HA-OC<sub>12</sub>: <sup>1</sup>H NMR (400 MHz CDCl<sub>3</sub>) δ 8.23 (t, 2H), 8.18 (d, 1H), 7.71 (m, 2H), 7.65 (d, 1H), 7.19 (m, 1H), 4.08 (t, 2H), 1.78 (m, 2H), 1.20 (m, 18H), 0.81 (t, 3H)

MS: 393 [C<sub>26</sub>H<sub>33</sub>O<sub>3</sub>]<sup>+</sup>.

2-HA-OC<sub>14</sub>: <sup>1</sup>H NMR (400 MHz CDCl<sub>3</sub>) δ 8.23 (t, 2H), 8.18 (d, 1H), 7.71 (m, 2H), 7.65 (d, 1H), 7.19 (m, 1H), 4.08 (t, 2H), 1.78 (m, 2H), 1.19 (m, 22H), 0.81 (t, 3H)

MS: 421 [C<sub>28</sub>H<sub>37</sub>O<sub>3</sub>]<sup>+</sup>.

2-HA-OC<sub>15</sub>: <sup>1</sup>H NMR (400 MHz CDCl<sub>3</sub>) δ 8.23 (t, 2H), 8.18 (d, 1H), 7.71 (m, 2H), 7.65 (d, 1H), 7.19 (m, 1H), 4.08 (t, 2H), 1.78 (m, 2H), 1.19 (m, 24H), 0.81 (t, 3H)

MS: 435 [C<sub>29</sub>H<sub>39</sub>O<sub>3</sub>]<sup>+</sup>.

2-HA-OC<sub>16</sub>: <sup>1</sup>H NMR (400 MHz CDCl<sub>3</sub>) δ 8.23 (t, 2H), 8.18 (d, 1H), 7.71 (m, 2H), 7.65 (d, 1H), 7.19 (m, 1H), 4.08 (t, 2H), 1.78 (m, 2H), 1.19 (m, 24H), 0.81 (t, 3H)

MS: 449 [C<sub>30</sub>H<sub>41</sub>O<sub>3</sub>]<sup>+</sup>.

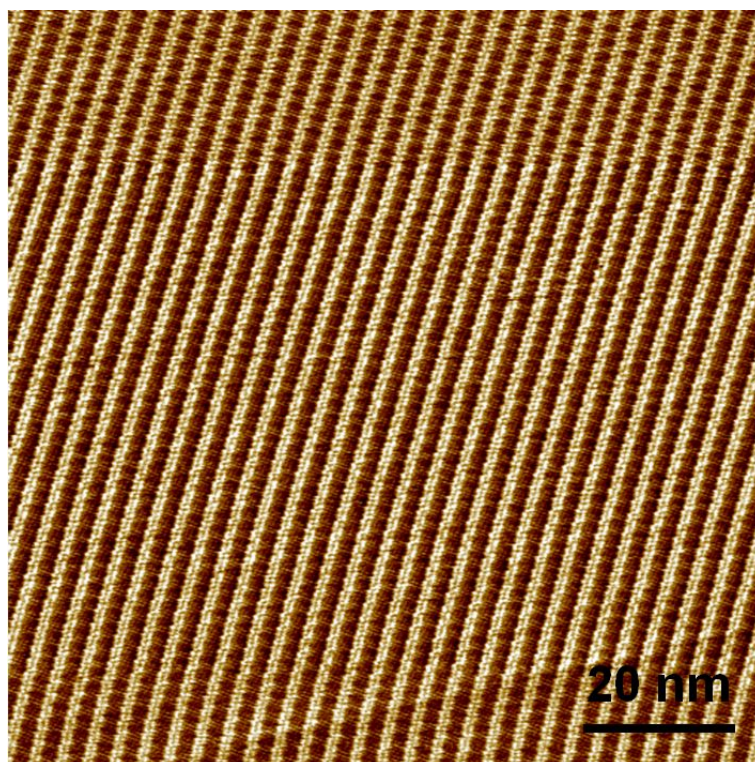

**Figure S1.** Large-scale STM image of 1-HA-OC<sub>16</sub> physisorbed in 1-octanoic acid on HOPG. A uniform linear structure covers the substrate surface, exhibiting this Linear I packing fashion. Imaging conditions:  $I_t = 500$  pA,  $V_{\text{bias}} = 750$  mV.

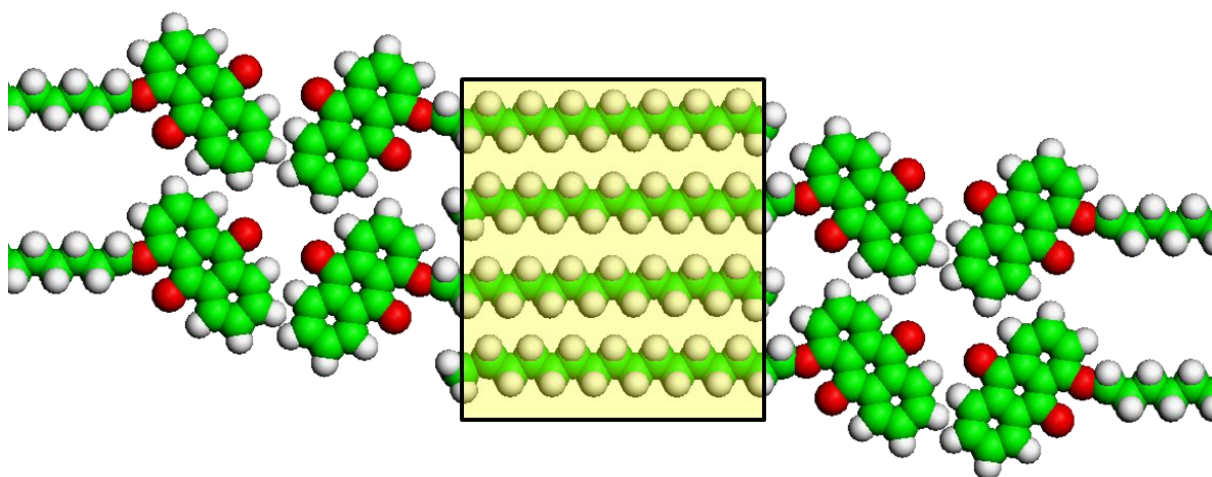

**Figure S2.** Space-filling spheres figure representation of the matched methyl and methylene groups in the side chains for 1-HA-OC<sub>16</sub>. The interdigitated carbon atoms are enclosed by the yellow rectangle. For this linear packing fashion, alkyl chains are supposed to be not fully interdigitated. Only fifteen carbon atoms in a chain participate in the interdigitation between neighboring side chains. This dislocation by one atom is caused by the requirement for minimum steric repulsion.

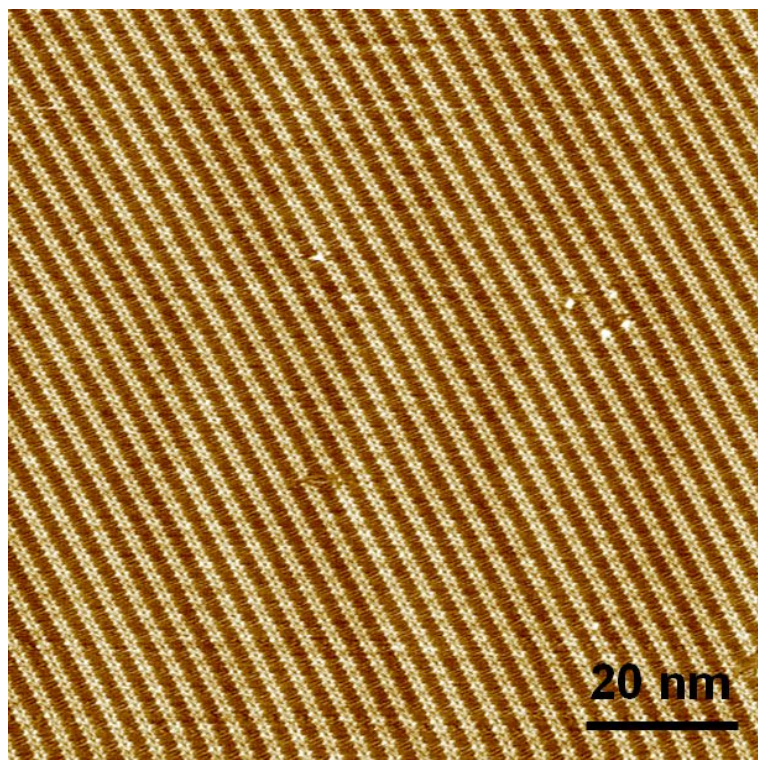

**Figure S3.** Large-scale STM image of 1-HA-OC<sub>15</sub> physisorbed in 1-octanoic acid on HOPG surface, showing the Linear II packing fashion. Imaging conditions:  $I_t = 450$  pA,  $V_{\text{bias}} = 600$  mV. The HOPG surface is covered with orderly molecular adlayer.

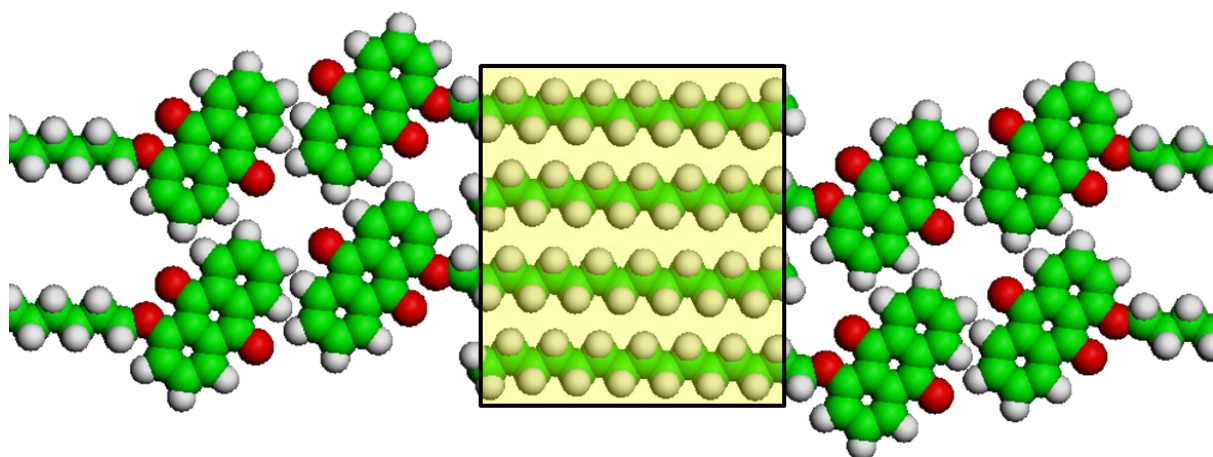

**Figure S4.** Space-filling spheres figure representation of the matched methyl and methylene groups in the side chains for 1-HA-OC<sub>15</sub>. The interdigitated carbon atoms are enclosed by the yellow rectangle. For this linear packing fashion, alkyl chains are supposed to be not fully interdigitated. Only fourteen carbon atoms in a chain participate in the interdigitation between neighboring side chains. This dislocation by one atom is caused by the requirement for minimum steric repulsion.

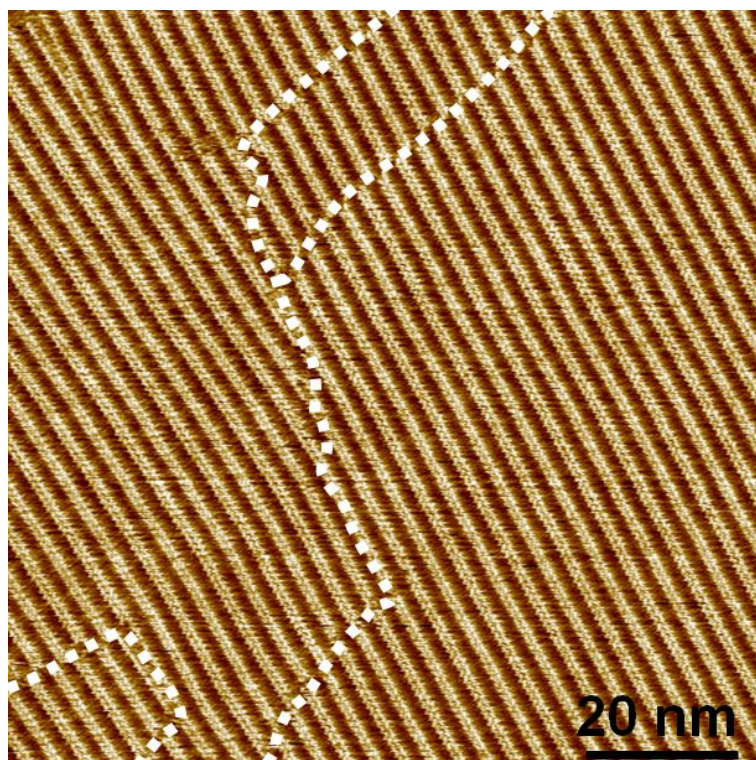

**Figure S5.** Large-scale STM image of 2-HA-OC<sub>12</sub> physisorbed on 1-octanoic acid/HOPG surface, showing the Linear IV packing fashion. It can be clear seen that the  $100 \times 100 \text{ nm}^2$  area is not uniform, with several domains separated by white dotted lines. Imaging conditions:  $I_t = 600 \text{ pA}$ ,  $V_{\text{bias}} = 800 \text{ mV}$ .

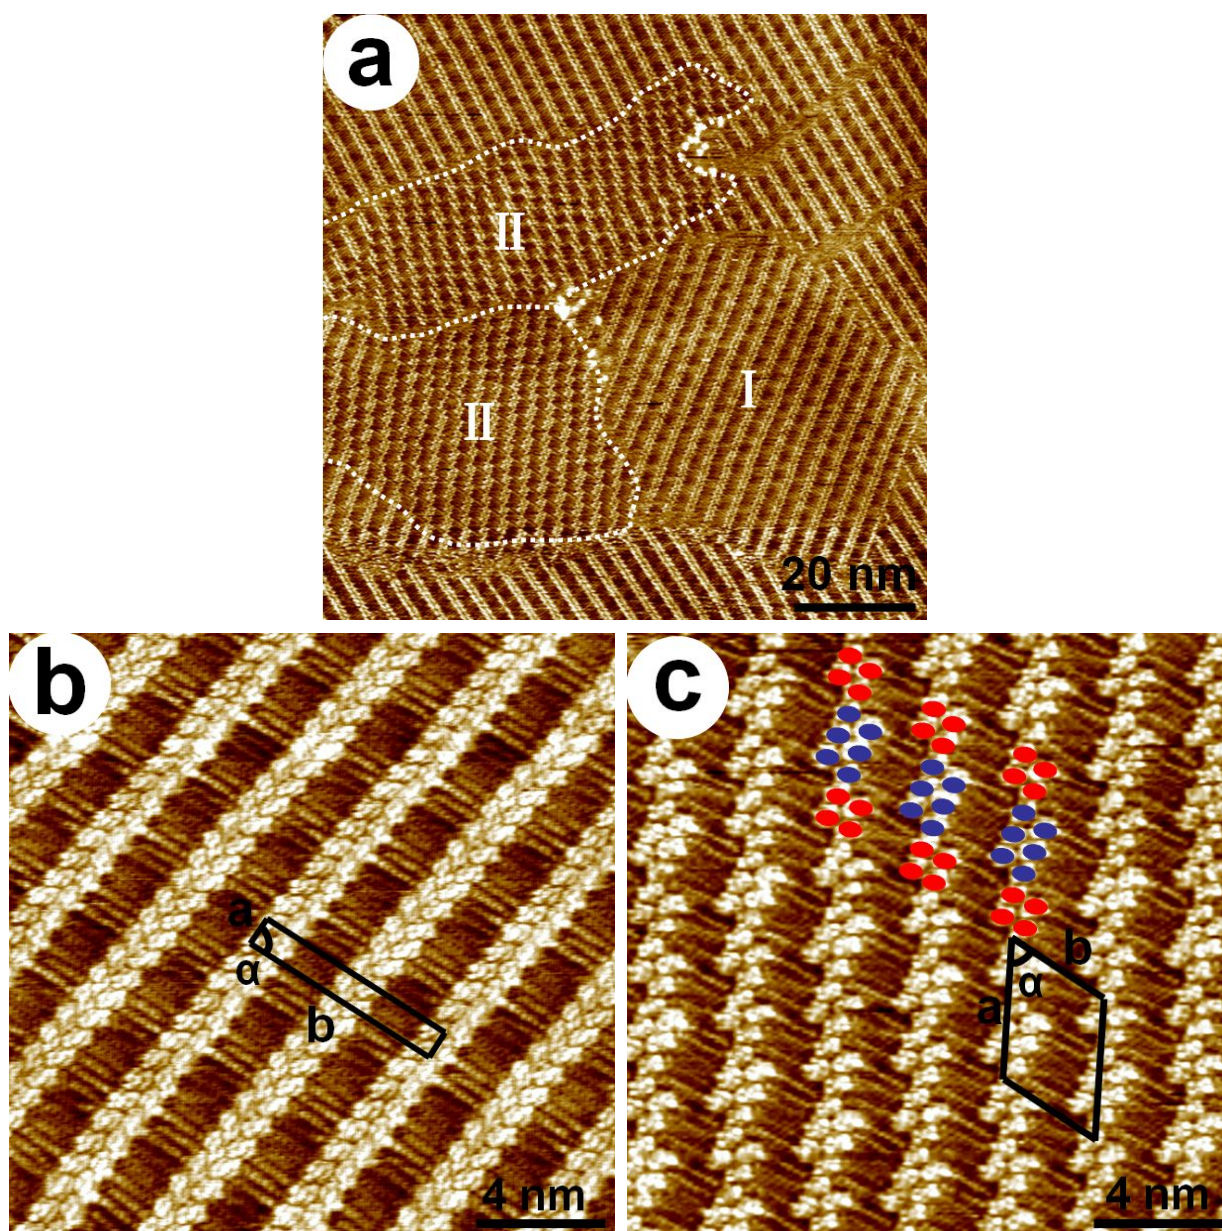

**Figure S6.** STM images of 2-HA-OC<sub>14</sub> physisorbed on 1-octanoic acid/HOPG interface. (a) Large-scale STM image consists of both Linear IV (domain I) and Z-Like (domain II) structures. (b) High-resolution STM image of the Linear IV packing fashion. (c) High-resolution STM image of the Z-Like packing fashion. Imaging conditions:  $I_t = 500$  pA,  $V_{\text{bias}} = 600$  mV. The parameters for basic unit cell imposed in (b) are:  $a = 0.9 \pm 0.1$  nm,  $b = 6.3 \pm 0.1$  nm and  $\alpha = 84 \pm 1^\circ$ . The parameters for basic unit cell imposed in (c) are:  $a = 5.5 \pm 0.2$  nm,  $b = 3.6 \pm 0.2$  nm and  $\alpha = 67 \pm 2^\circ$ . According to the unit cell parameters, the calculated area densities are  $1.41$  nm<sup>2</sup> per molecule for Linear IV and  $1.82$  nm<sup>2</sup> per molecule for Z-Like structure.

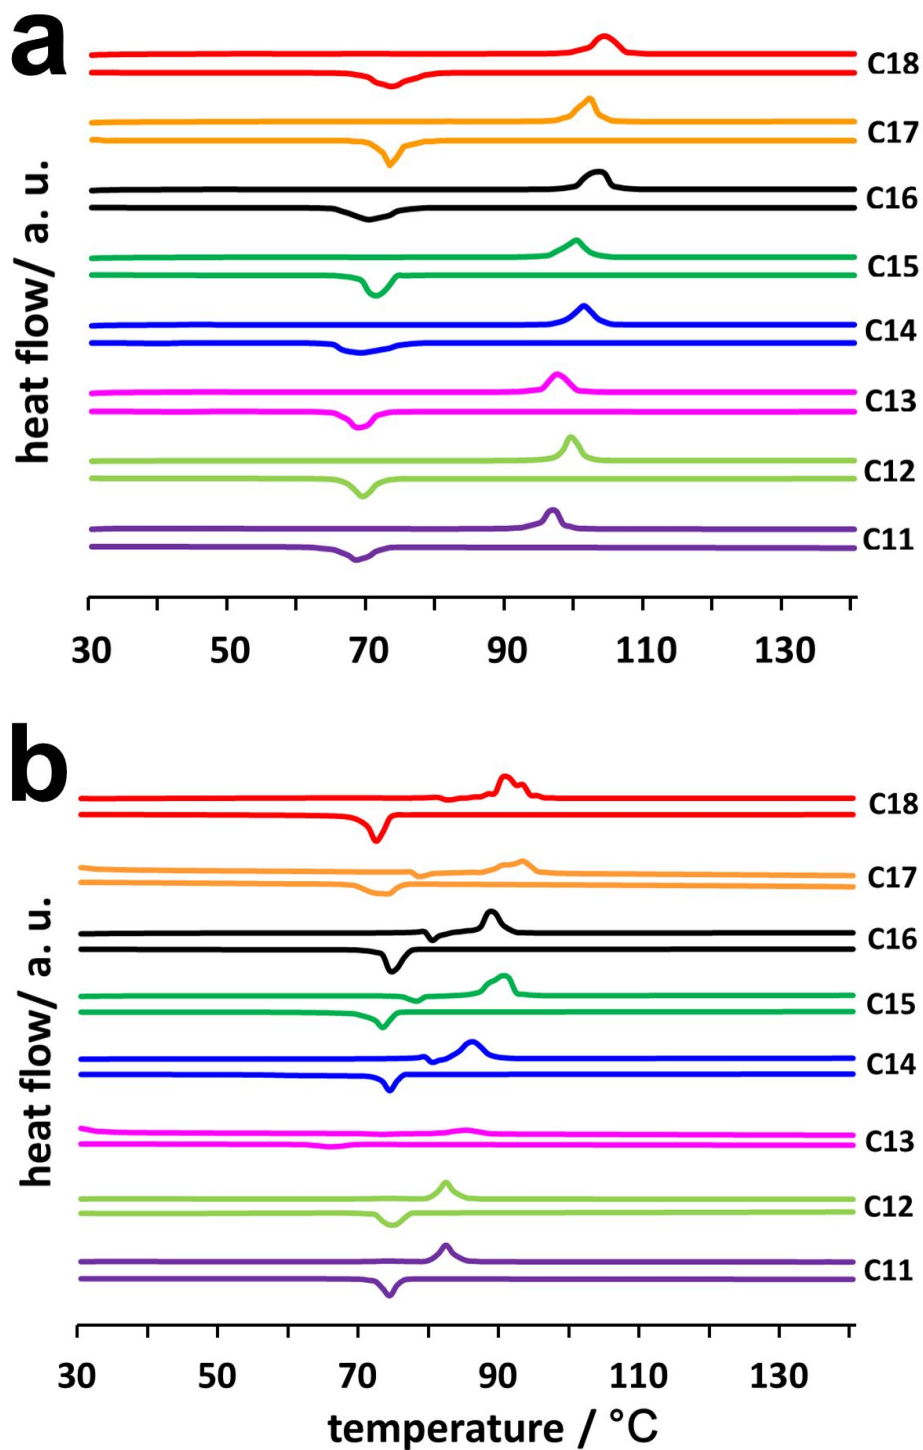

**Figure S7.** DSC thermograms of compounds 1-HA-OC<sub>n</sub> (a) and 2-HA-OC<sub>n</sub> (b) for the trace of heating (the above line) and cooling (the below line).
